# Supplementary material for: Impact of Preservation Method and 16S rRNA Hypervariable Region on Gut Microbiota Profiling
Source: PubMed Central journal article supplement (PMC6392095; doi:10.1128/msystems.00271-18), 2019-02-26
Supplement: mSystems.00271-18-s0001.pdf [file mSystems.00271-18-s0001.pdf]

The following pipelines are applicable to the 16S V3-V4 dataset. Only key parameters for 16S V1-V2 and 16S V4 datasets are listed. All demultiplexed paired-end fastq sequences and metadata are available from SRA (PRJNA470603).

We used SILVA\_132 99% reference database to train the feature classifiers. The full-length sequences is available from SILVA website (<https://www.arb-silva.de/download/archive/qiime>).

#### **# loading qiime2-2018.8 environment**

```
source activate qiime2-2018.8
```

#### **# training 16S classifiers (SILVA\_132\_99)**

```
qiime tools import \  
  --type 'FeatureData[Sequence]' \  
  --input-path 99/silva_132_99_16S.fna \  
  --output-path 99_otus.qza  
  
qiime tools import \  
  --type 'FeatureData[Taxonomy]' \  
  --source-format HeaderlessTSVTaxonomyFormat \  
  --input-path 99/taxonomy_7_levels.txt \  
  --output-path 99_taxonomy.qza
```

#### **# extracting and training the SILVA 16SV3-V4 classifier**

```
qiime feature-classifier extract-reads \  
  --i-sequences 99_otus.qza \  
  --p-f-primer CCTACGGGNGGCWGCAG \  
  --p-r-primer GGACTACNVGGGTWTCTAAT \  
  --p-trunc-len 466 \  
  --o-reads ref-seqs-v34.qza  
  
qiime feature-classifier fit-classifier-naive-bayes \  
  --i-reference-reads ref-seqs-v34.qza \  
  --i-reference-taxonomy 99_taxonomy.qza \  
  --o-classifier silva132_v34_classifier.qza
```

### **# importing data**

```
qiime tools import \  
  --type 'SampleData[PairedEndSequencesWithQuality]' \  
  --input-path /Folder_Containing_16SV3V4_Paired_End_Fastq/ \  
  --input-format CasavaOneEightSingleLanePerSampleDirFmt \  
  --output-path demux-paired-end-v34.qza
```

### **# denoising 16S V3-V4 data using dada2**

```
qiime dada2 denoise-paired \  
  --i-demultiplexed-seqs demux-paired-end-v34.qza \  
  --p-trim-left-f 17 \  
  --p-trunc-len-f 250 \  
  --p-trim-left-r 20 \  
  --p-trunc-len-r 250 \  
  --o-table table-v34.qza \  
  --o-representative-sequences rep-seqs-v34.qza \  
  --p-n-threads 12 \  
  --output-dir dada2-v34
```

### **# assigning taxonomy**

```
qiime feature-classifier classify-sklearn \  
  --i-classifier silva132_v34_classifier.qza \  
  --i-reads rep-seqs-v34.qza \  
  --o-classification taxonomy-v34.qza \  
  --p-read-orientation 'same' \  
  --p-n-jobs 12
```

### **# make denovo phylogeny of OTUs**

```
qiime alignment mafft \  
  --i-sequences rep-seqs-v34.qza \  
  --o-alignment aligned-rep-seqs-v34.qza  
  
qiime alignment mask \  
  --i-alignment aligned-rep-seqs-v34.qza \  
  --o-masked-alignment masked-aligned-rep-seqs-v34.qza  
  
qiime phylogeny fasttree \  
  --i-alignment masked-aligned-rep-seqs-v34.qza \  
  --o-tree unrooted-tree-v34.qza  
  
qiime phylogeny midpoint-root \  
  --i-tree unrooted-tree-v34.qza \  
  --o-rooted-tree rooted-tree-v34.qza
```

### **# exporting tree as a newick formatted file**

```
qiime tools export \  
  --input-path rooted-tree-v34.qza \  
  --output-path exported-rooted-tree-v34
```

### **# exporting OTU feature table**

```
qiime tools export \  
  --input-path table-v34.qza \  
  --output-path exported-otu-table-v34  
  
biom convert \  
  -i exported-otu-table-v34/feature-table.biom \  
  -o exported-otu-table-v34/feature-table-v34.tsv \  
  --to-tsv \  
  --table-type "OTU table"
```

### **# collapsing feature tables by the taxonomy at the specific level (--p-level 6==genus, 5==family, 4==order, 3==class, 2==phylum)**

```
qiime taxa collapse \  
  --i-table table-v34.qza \  
  --i-taxonomy taxonomy-v34.qza \  
  --p-level 6 \  
  --o-collapsed-table collapsed-table-v34-16  
  
qiime tools export \  
  --input-path collapsed-table-v34-16.qza \  
  --output-path exported-collapsed-table-v34  
  
biom convert \  
  -i exported-collapsed-table-v34/feature-table.biom \  
  -o exported-collapsed-table-v34/otu-table-v34-16.tsv \  
  --to-tsv \  
  --table-type "OTU table"
```

### **# exporting taxonomy**

```
qiime tools export \  
  --input-path taxonomy-v34.qza \  
  --output-path exported-taxonomy-v34
```

### **# exporting representative OTU sequences**

```
qiime tools export \  
  --input-path rep-seqs-v34.qza \  
  --output-path exported-rep-seqs-v34
```

### **# extracting and training the SILVA V1-V2 classifier**

```
qiime feature-classifier extract-reads \  
  --i-sequences 99_otus.qza \  
  --p-f-primer AGAGTTTGATYMTGGCTCAG \  
  --p-r-primer TGCTGCCTCCCGTAGGAGT \  
  --p-trunc-len 349 \  
  --o-reads ref-seqs-v12.qza  
  
qiime feature-classifier fit-classifier-naive-bayes \  
  --i-reference-reads ref-seqs-v12.qza \  
  --i-reference-taxonomy 99_taxonomy.qza \  
  --o-classifier silva132_v12_classifier.qza
```

### **# extracting and training the SILVA V4 classifier**

```
qiime feature-classifier extract-reads \  
  --i-sequences 99_otus.qza \  
  --p-f-primer GTGYCAGCMGCCGCGGTA \  
  --p-r-primer GGACTACNVGGGTWTCTAAT \  
  --p-trunc-len 292 \  
  --o-reads ref-seqs-v4.qza  
  
qiime feature-classifier fit-classifier-naive-bayes \  
  --i-reference-reads ref-seqs-v4.qza \  
  --i-reference-taxonomy 99_taxonomy.qza \  
  --o-classifier silva132_v4_classifier.qza
```

### # denoising 16S V1-V2 data using dada2

```
qiime dada2 denoise-paired \  
  --i-demultiplexed-seqs demux-paired-end-v12.qza \  
  --p-trim-left-f 20 \  
  --p-trunc-len-f 200 \  
  --p-trim-left-r 19 \  
  --p-trunc-len-r 200 \  
  --o-table table-v12.qza \  
  --o-representative-sequences rep-seqs-v12.qza \  
  --p-n-threads 12 \  
  --output-dir dada2-v12
```

### # denoising 16S V4 data using dada2

```
qiime dada2 denoise-paired \  
  --i-demultiplexed-seqs demux-paired-end-v4.qza \  
  --p-trim-left-f 18 \  
  --p-trunc-len-f 175 \  
  --p-trim-left-r 20 \  
  --p-trunc-len-r 175 \  
  --o-table table-v4.qza \  
  --o-representative-sequences rep-seqs-v4.qza \  
  --p-n-threads 12 \  
  --output-dir dada2-v4
```

**# merge data from different 16S regions using fragment insertion AKA SEPP**

```
qiime feature-table merge \  
  --i-tables table-v12.qza \  
  --i-tables table-v34.qza \  
  --i-tables table-v4.qza \  
  --o-merged-table insertion-table.qza  
  
qiime feature-table merge-taxa \  
  --i-data taxonomy-v12.qza \  
  --i-data taxonomy-v34.qza \  
  --i-data taxonomy-v4.qza \  
  --o-merged-data insertion-taxonomy.qza  
  
qiime feature-table merge-seqs \  
  --i-data rep-seqs-v12.qza \  
  --i-data rep-seqs-v34.qza \  
  --i-data rep-seqs-v4.qza \  
  --o-merged-data insertion-rep-seqs.qza  
  
qiime fragment-insertion sepp \  
  --i-representative-sequences insertion-rep-seqs.qza \  
  --p-threads 12 \  
  --o-tree insertion-tree.qza \  
  --o-placements insertion-placements.qza
```

**# Use 'insertion-tree.qza' for all downstream phylogenetic analyses**

```
# exiting qiime2-2018.8 environment
```

```
source deactivate qiime2-2018.8
```
